# Supplementary material for: A Dual-Channel Naked-Eye Fluorescent Probe for Discriminative Detection of Sulfur Dioxide and Hydrazine
Source: Preprints.org preprint supplement (doi:10.20944/preprints202410.1168.v1), 2024-10-15
Supplement: Supplementary file 1 [file supplementary]

**A dual-channel Naked-Eye fluorescent probe for discriminative detection of sulfur dioxide and hydrazine**

Sha Li a[[1]](#footnote-1)*, Yu Haoa, Jun Zhenga , Xingao Zhanga

aDepartment of Chemistry, Xinzhou Teachers University, Xinzhou 034000, China

**1. Characterization of compounds**


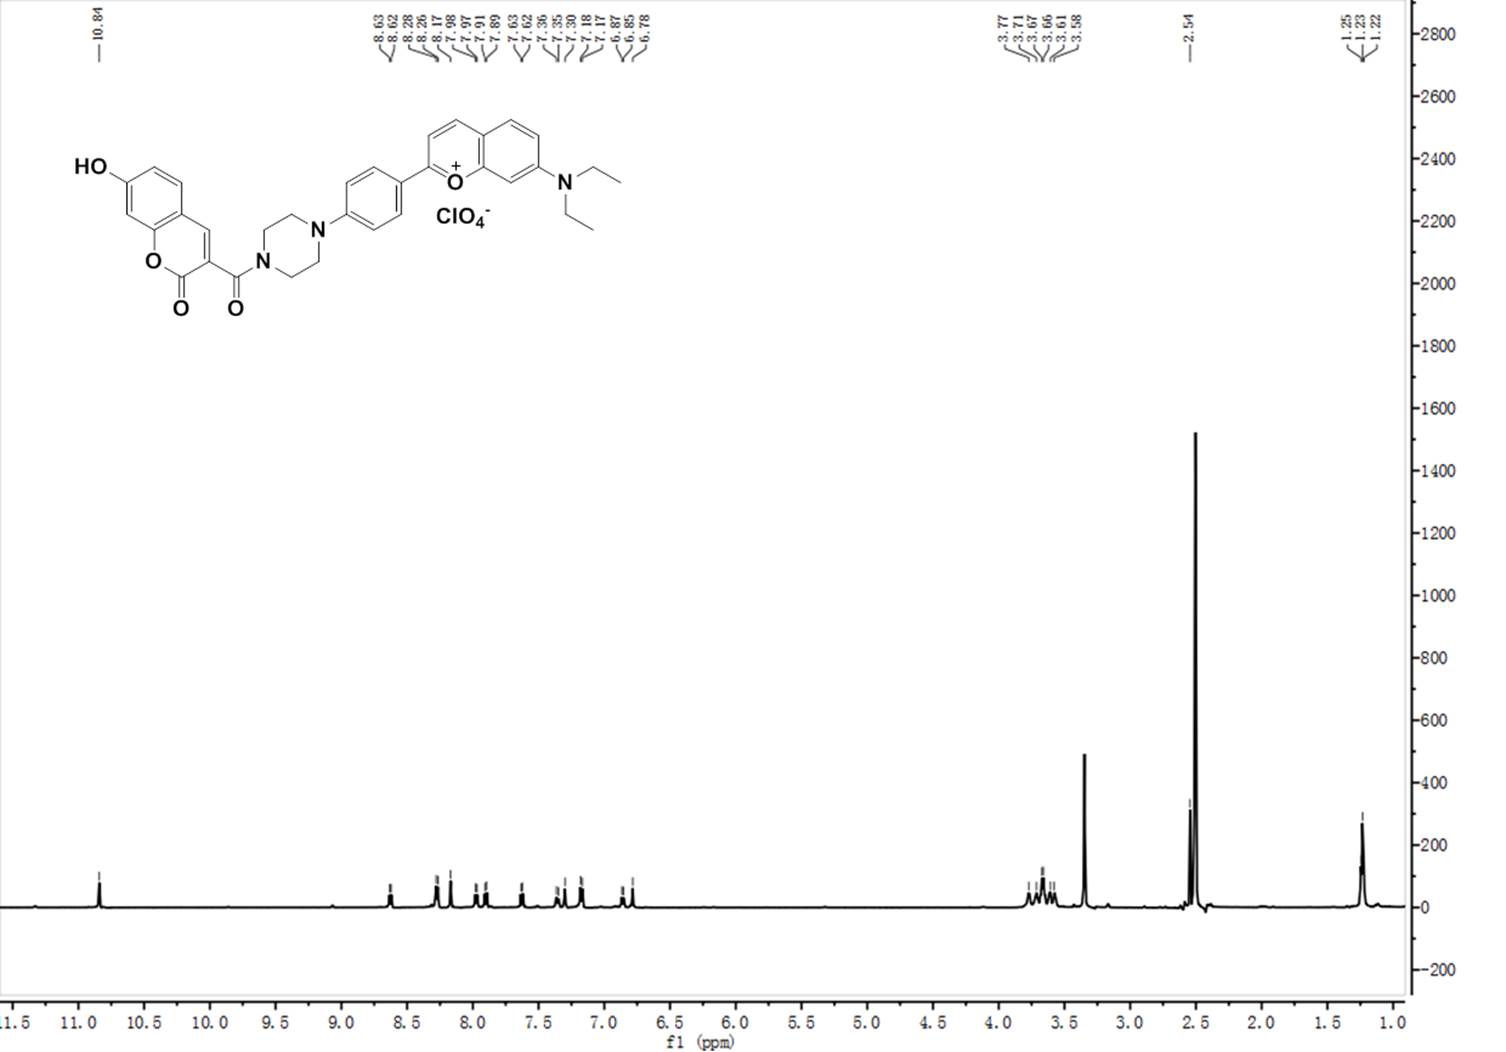


Figure S1 1H NMR (600 MHz) of **PI-CO** in DMSO-*d*6


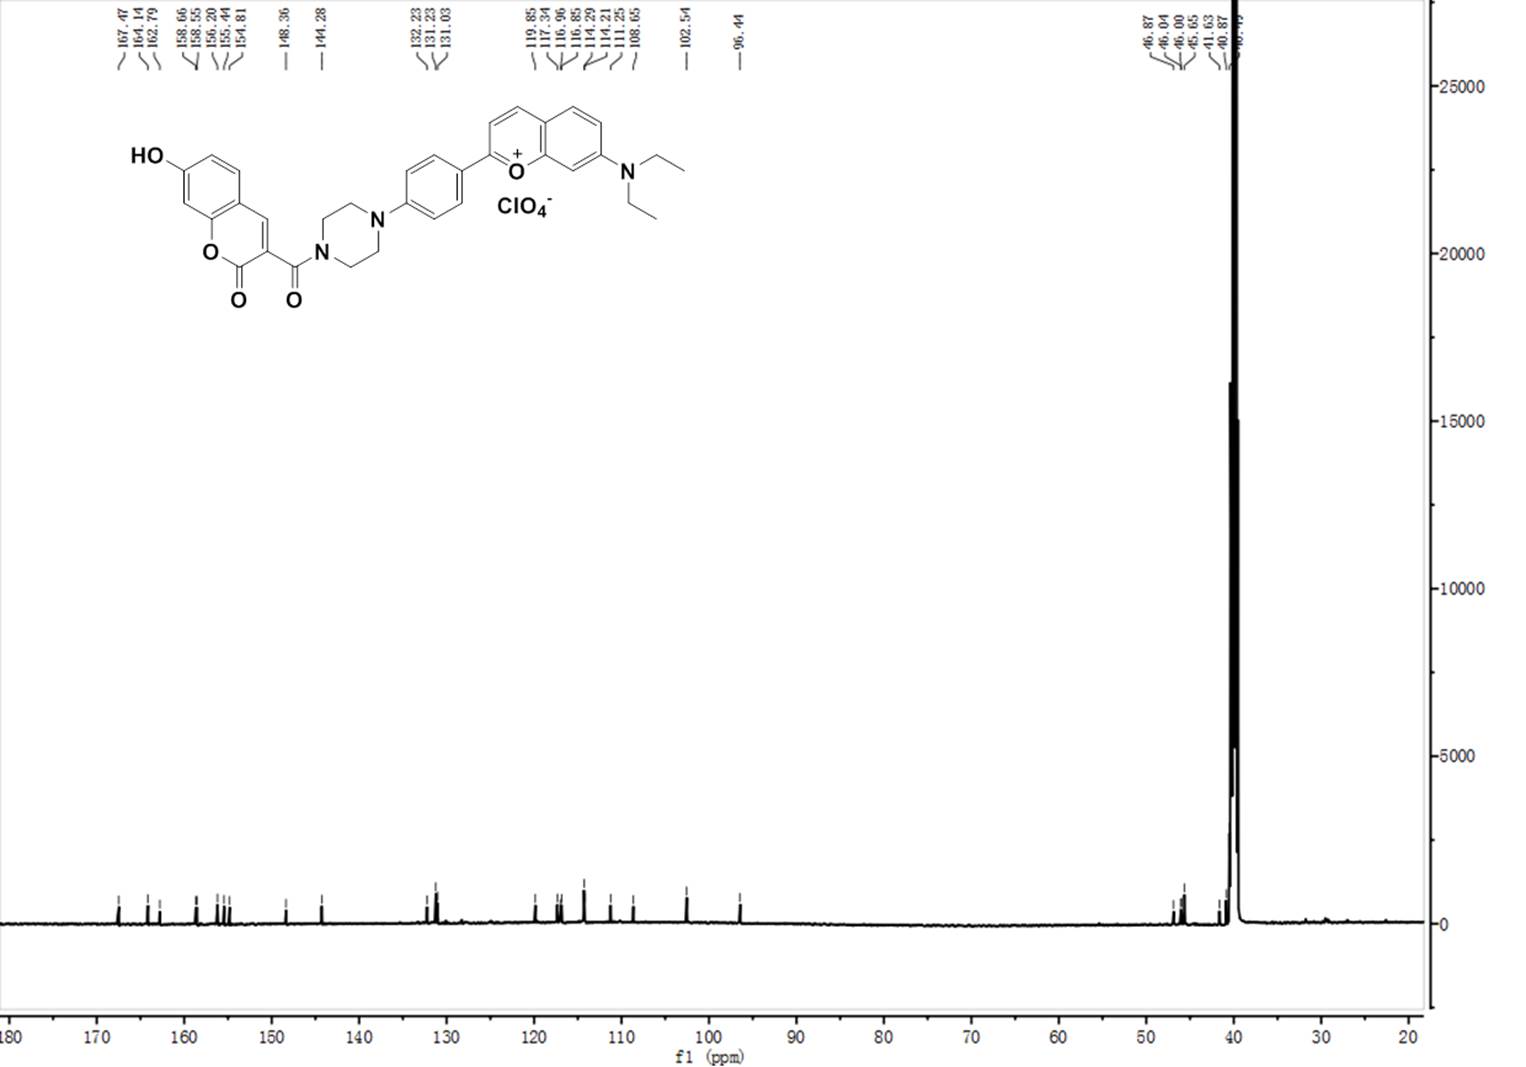


13C NMR (150 MHz) of **PI-CO** in DMSO-*d*6


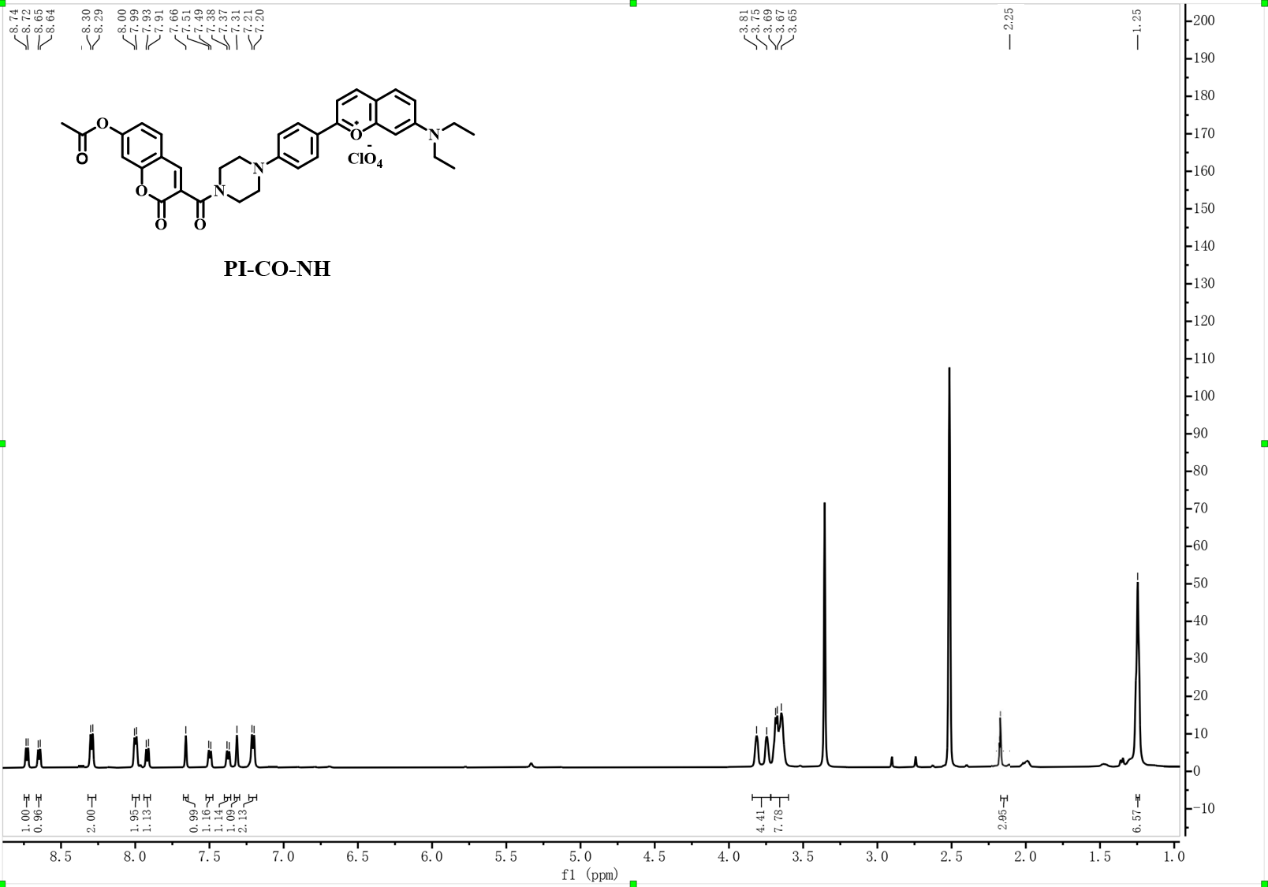


Figure S2 1H NMR (600 MHz) of **PI-CO-NH** in DMSO-*d*6


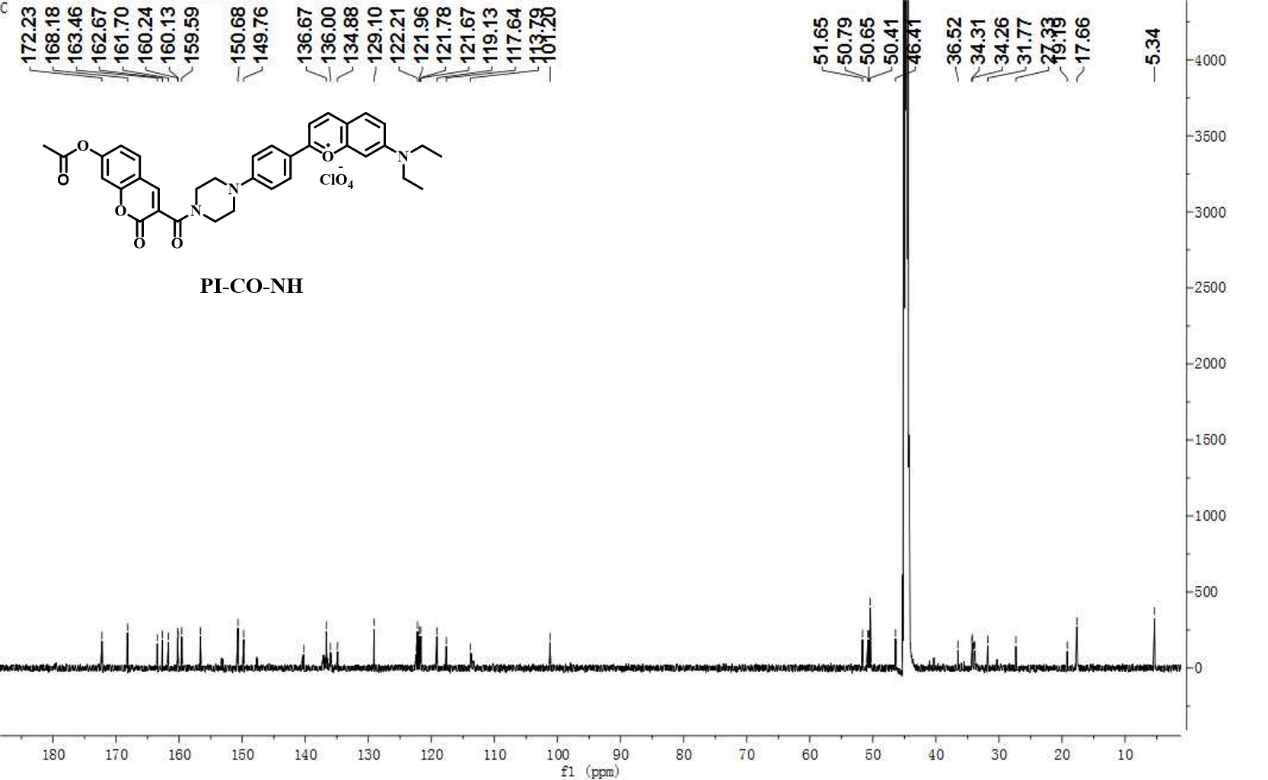


13C NMR (150 MHz) of **PI-CO-NH** in DMSO-*d*6


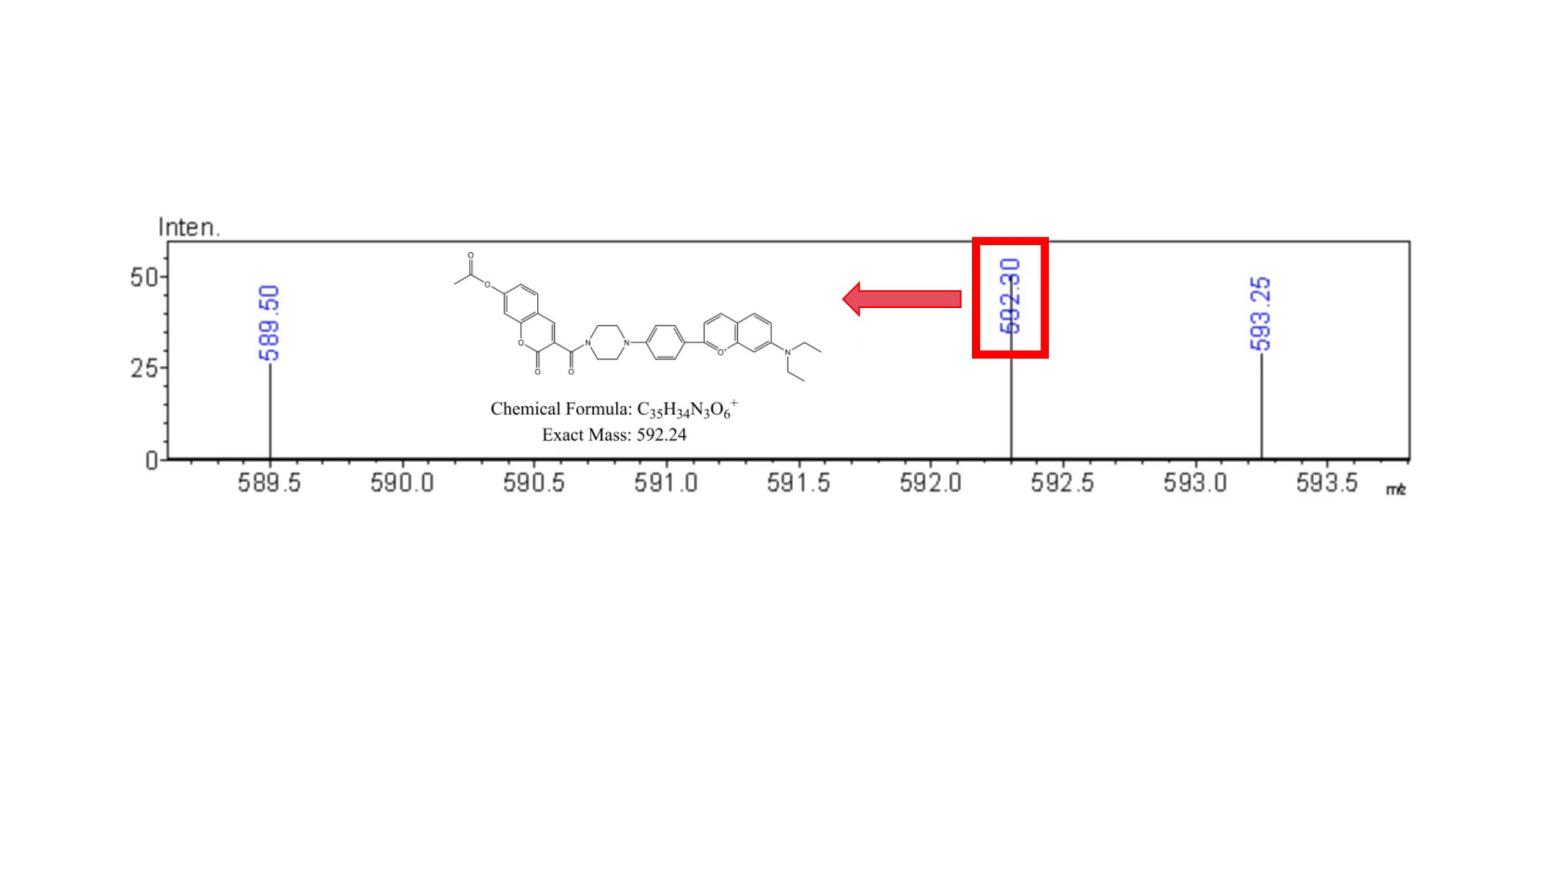


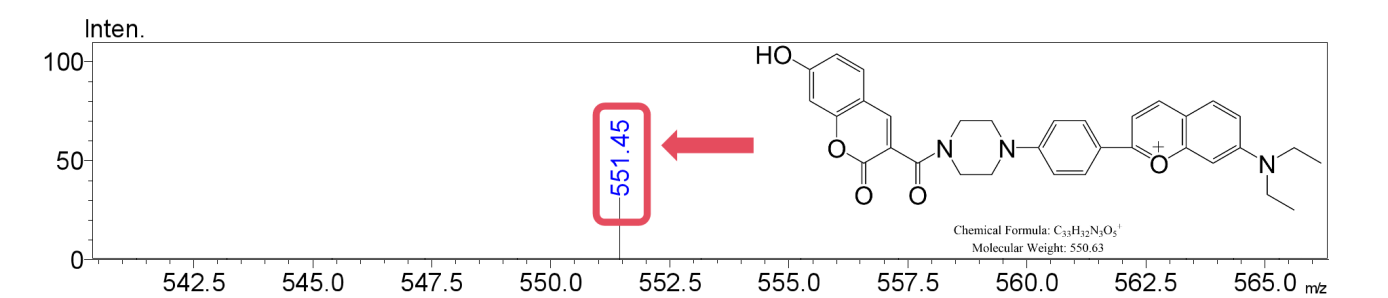


（a）


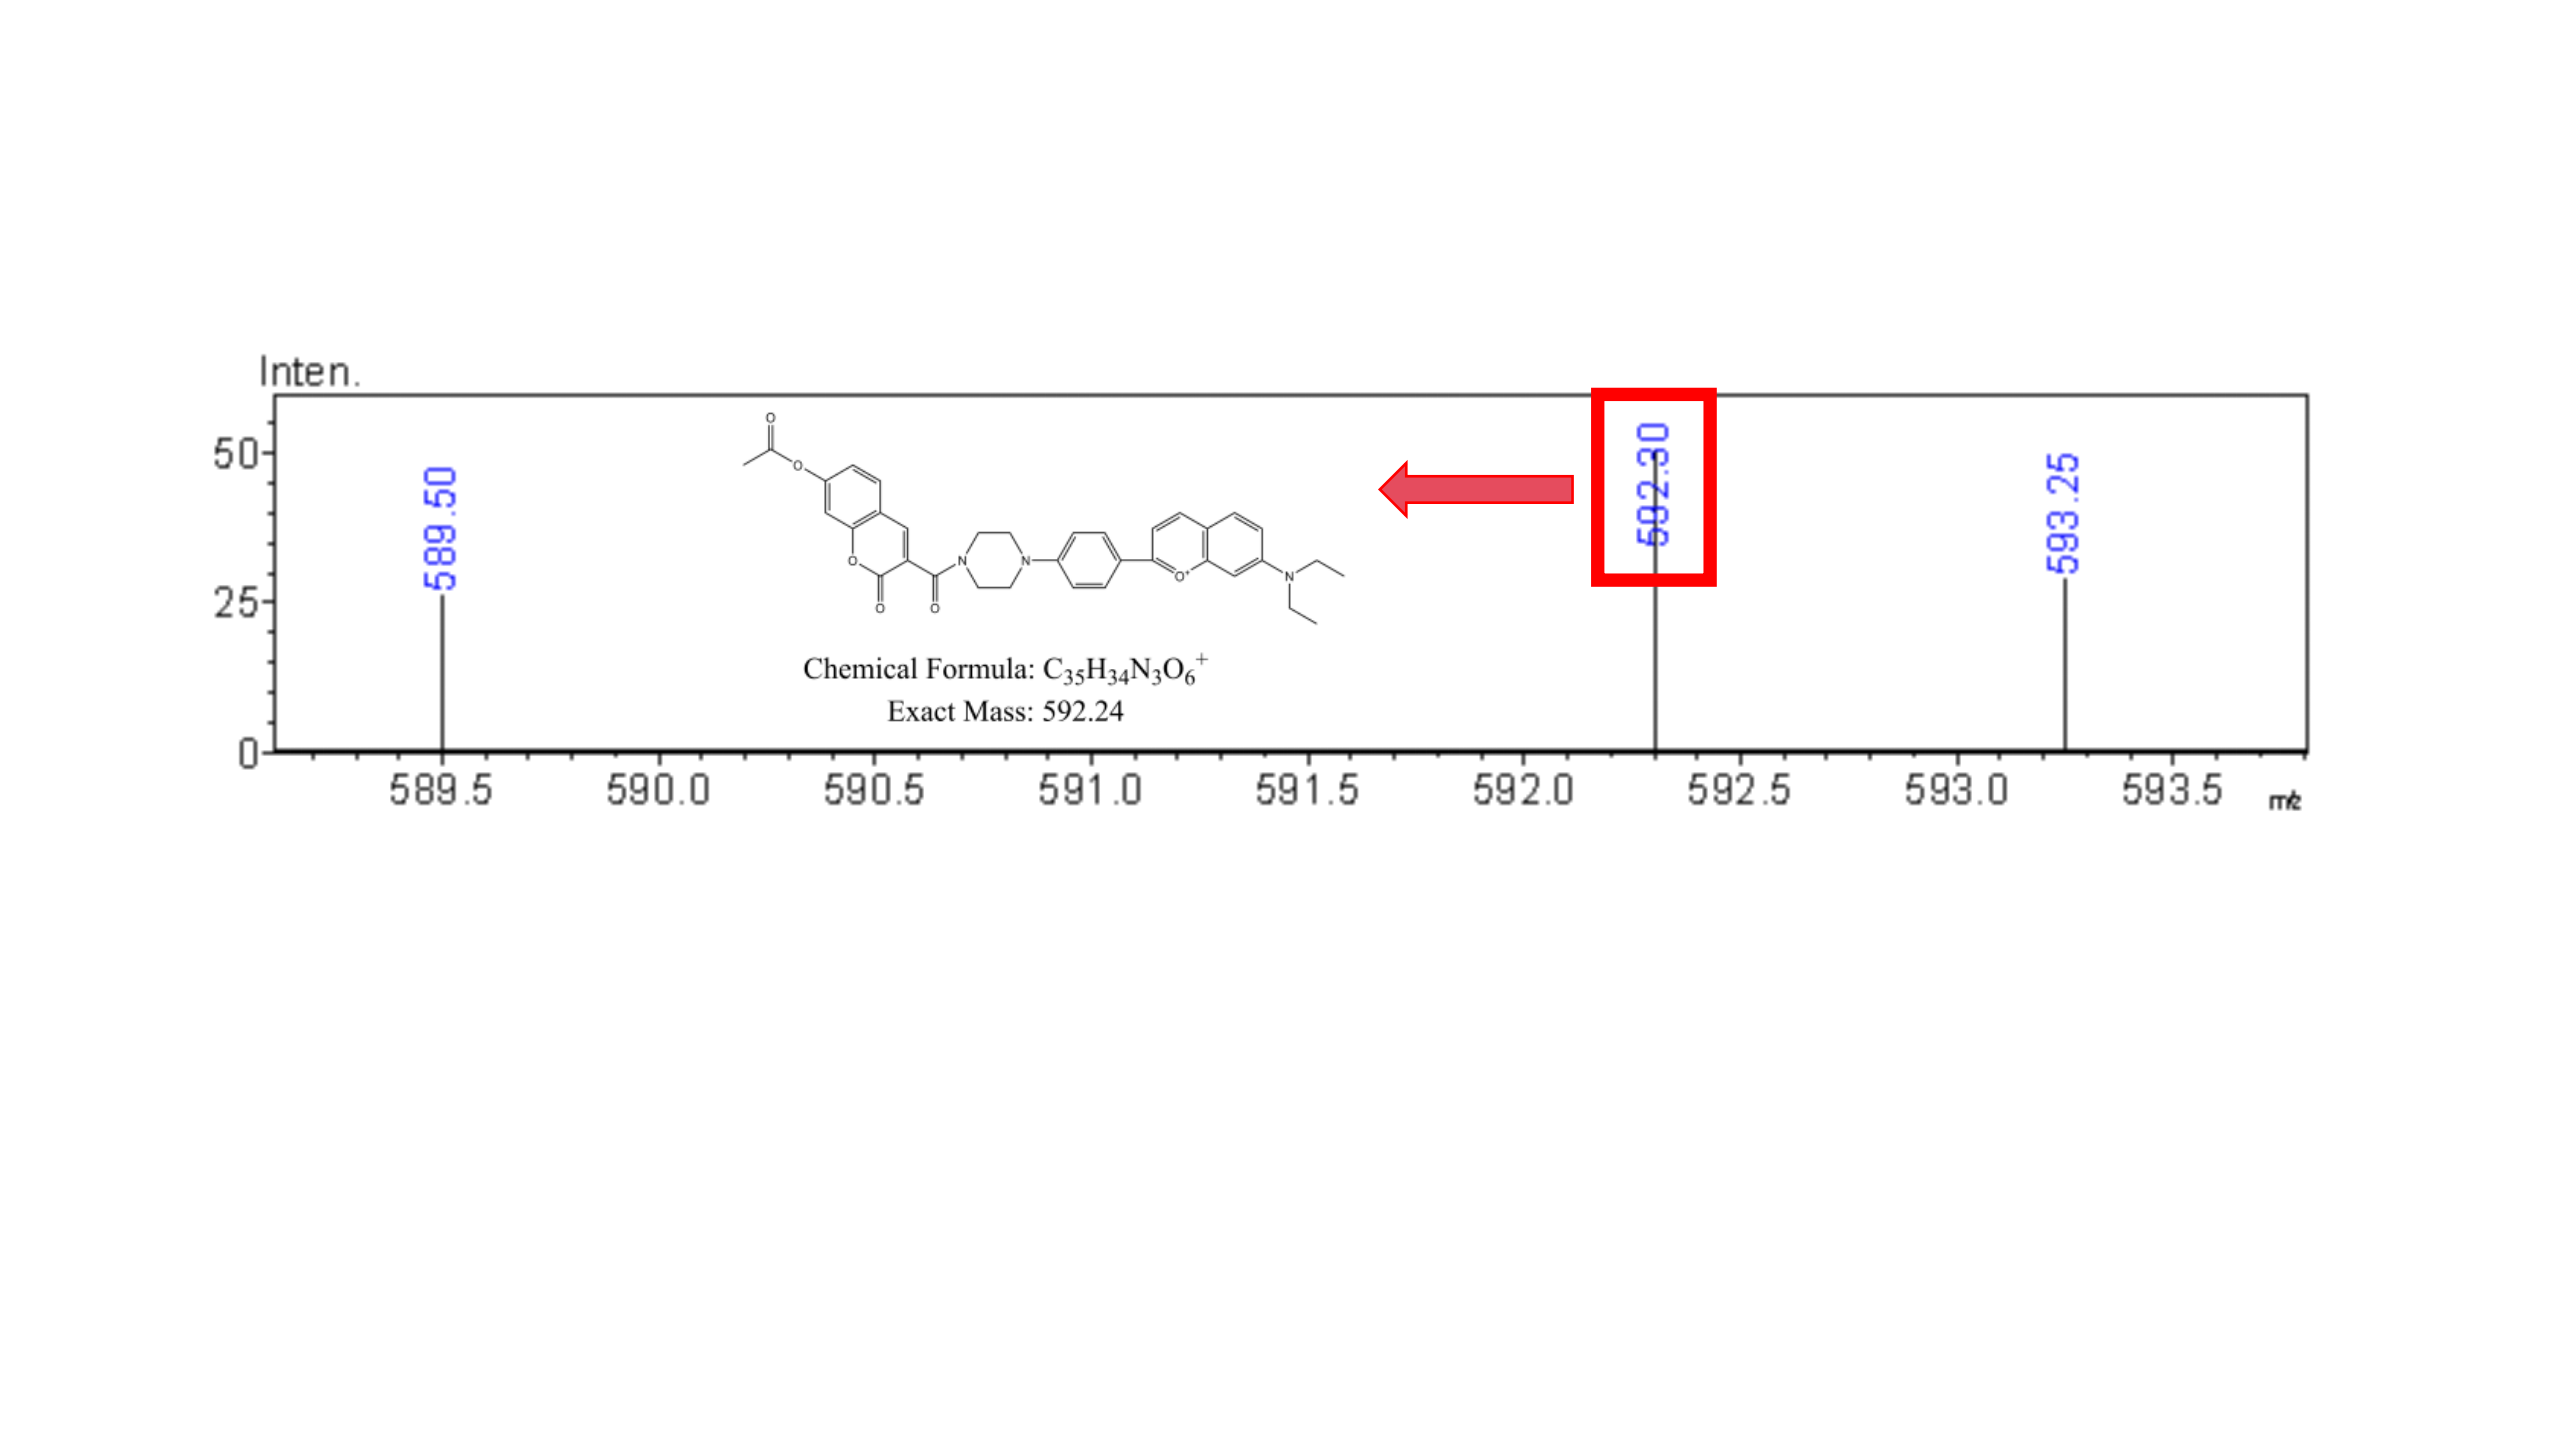


（b）


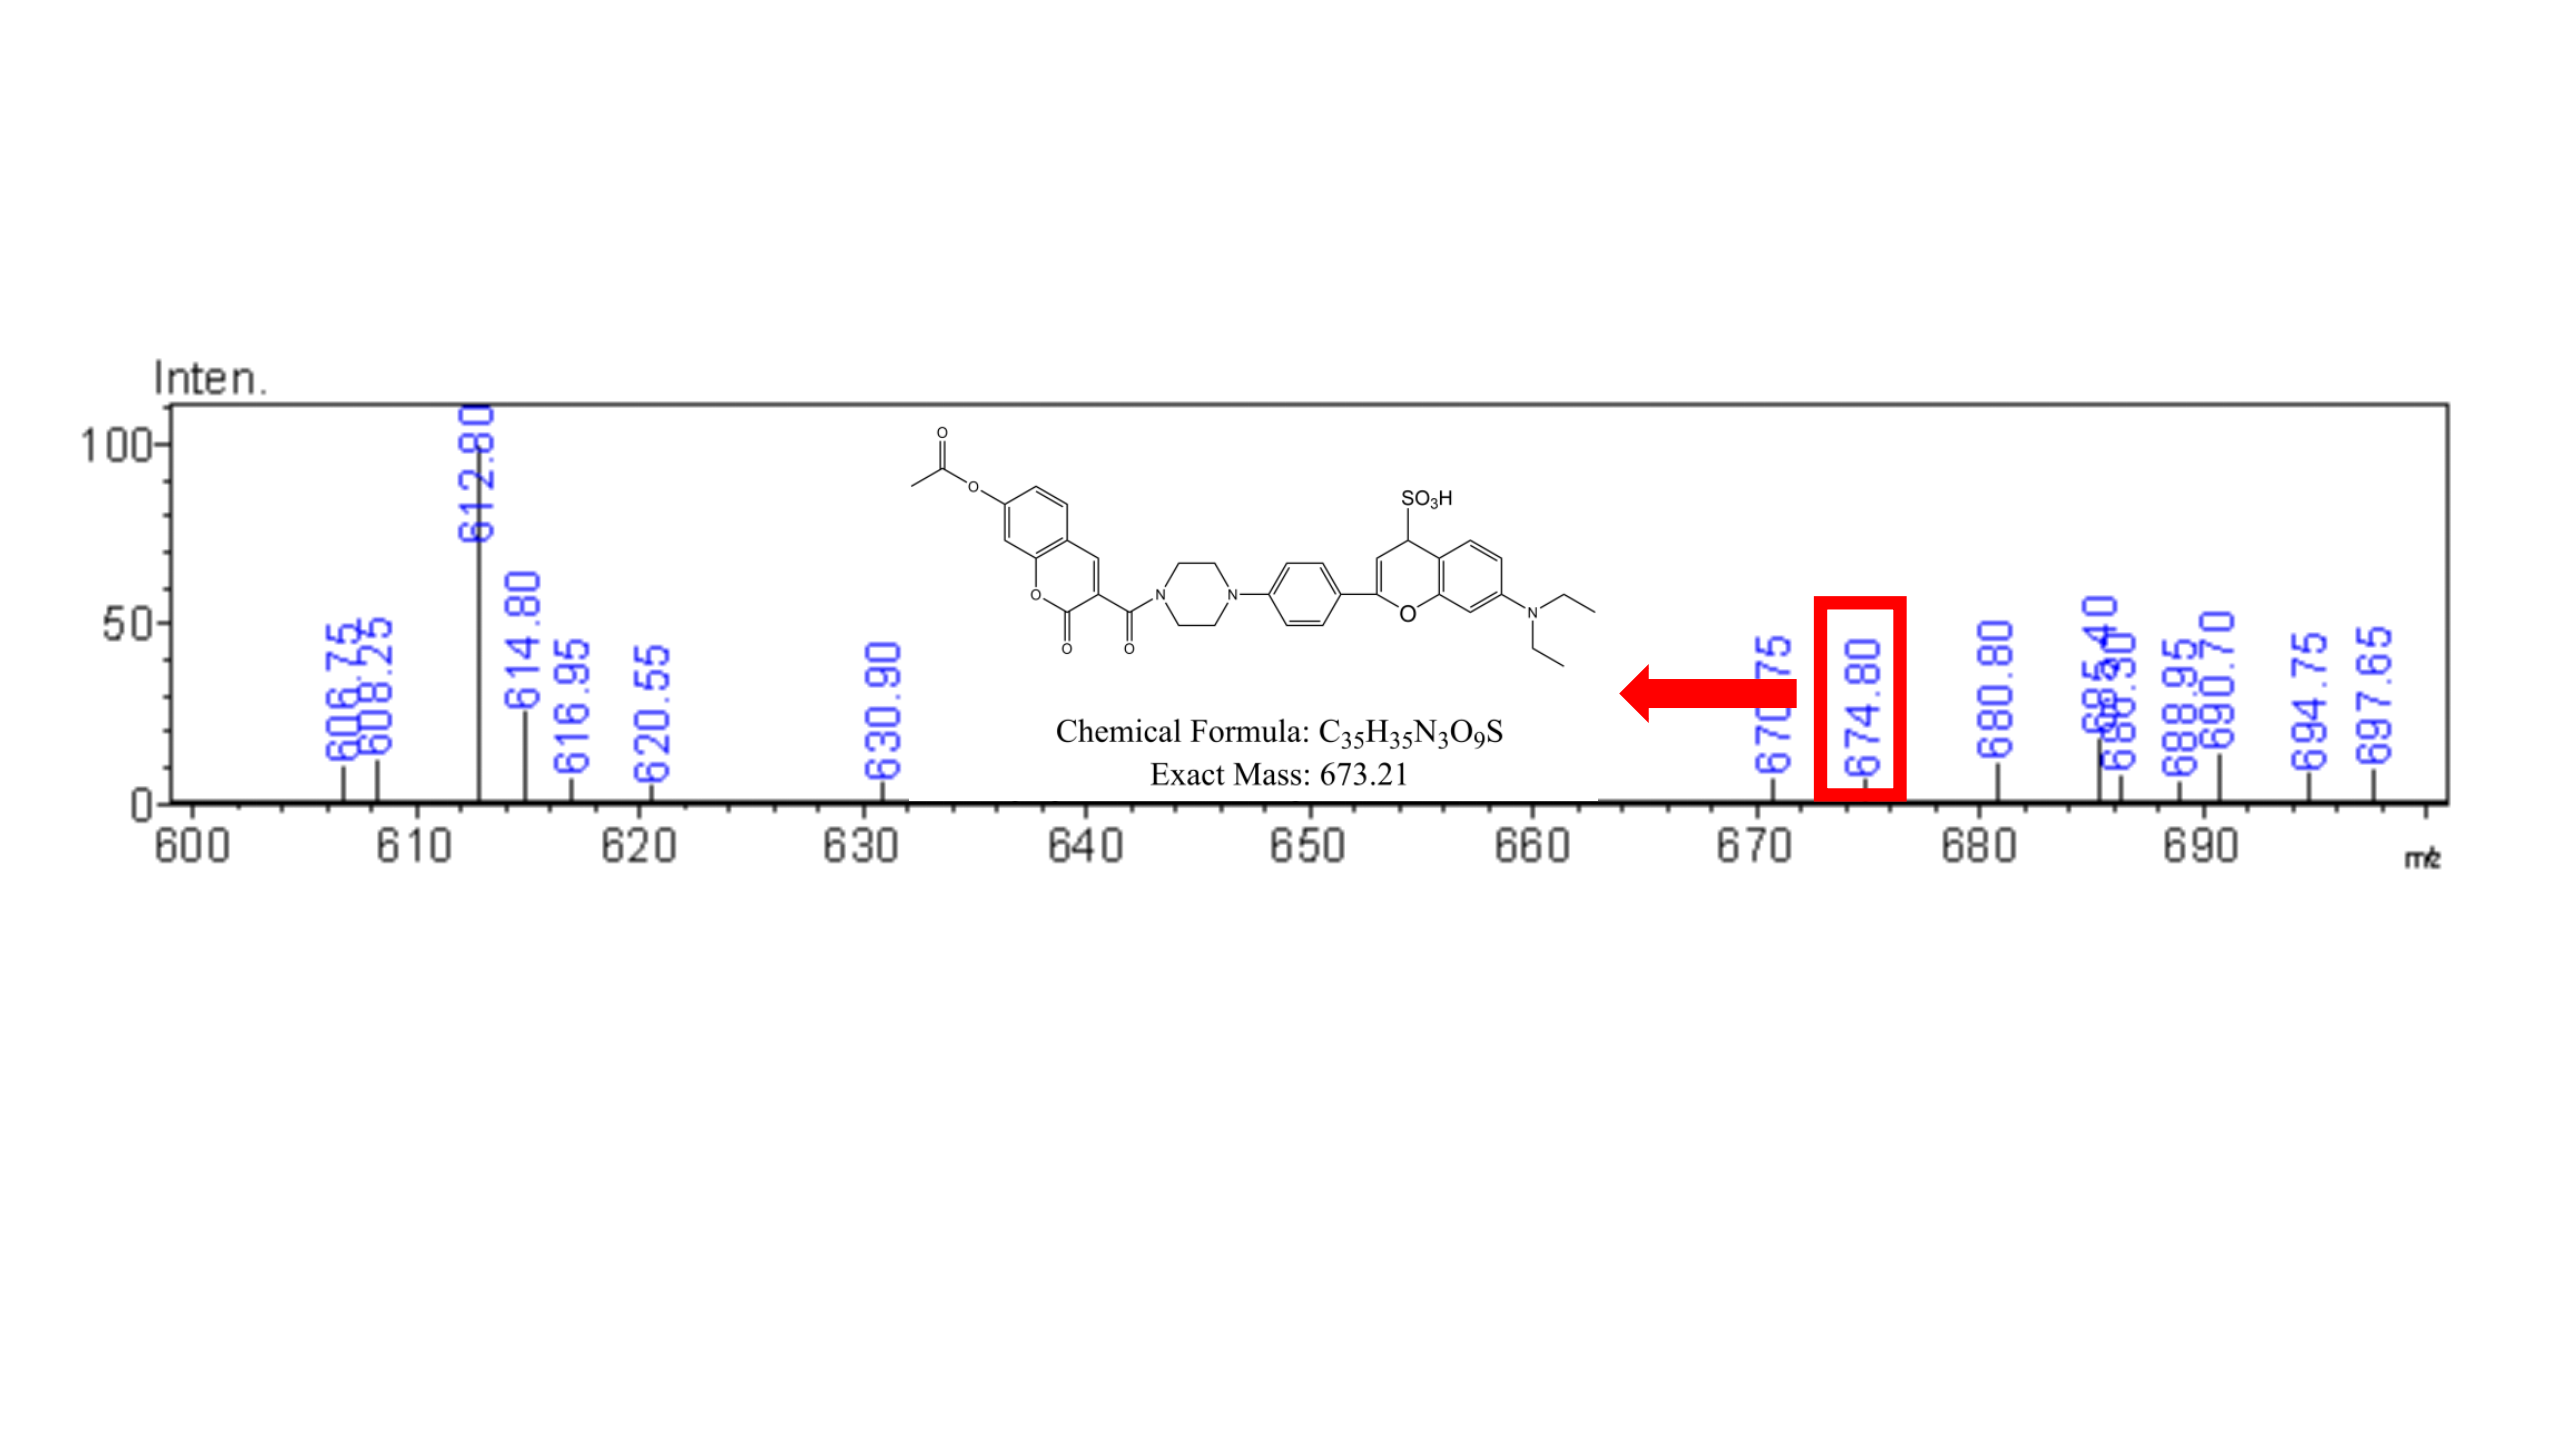


Figure S3 HRMS spectra of **PI-CO-NH** with N2H4 and SO2

1. E-mail address: [lisaa0612@163.com](mailto:lisaa0612@163.com) [↑](#footnote-ref-1)
